# Supplementary material for: Gaps in Dyslipidemia Care Among Working‐Aged Individuals With Employer‐Sponsored Health Care
Source: PubMed Central journal article supplement — J Am Heart Assoc. 2020 Apr 22;9(9):e015807. doi: 10.1161/JAHA.119.015807 (PMC7428576; doi:10.1161/jaha.119.015807), 2020-04-22
Supplement: JAH3-9-e015807-s001.pdf [file JAH3-9-e015807-s001.pdf]

# **Supplemental Material**

**Table S1. ICD9 and ICD10 codes defining atherosclerotic cardiovascular disease.**

| <b>ICD Type</b> | <b>ICD Code</b> | <b>Description</b>                                                                             |
|-----------------|-----------------|------------------------------------------------------------------------------------------------|
| ICD-10-CM       | G450            | Vertebro-basilar artery syndrome                                                               |
| ICD-10-CM       | G451            | Carotid artery syndrome (hemispheric)                                                          |
| ICD-10-CM       | G452            | Multiple and bilateral precerebral artery syndromes                                            |
| ICD-10-CM       | G453            | Amaurosis fugax                                                                                |
| ICD-10-CM       | G454            | Transient global amnesia                                                                       |
| ICD-10-CM       | G458            | Oth transient cerebral ischemic attacks and related synd                                       |
| ICD-10-CM       | G459            | Transient cerebral ischemic attack, unspecified                                                |
| ICD-10-CM       | I200            | Unstable angina                                                                                |
| ICD-10-CM       | I201            | Angina pectoris with documented spasm                                                          |
| ICD-10-CM       | I208            | Other forms of angina pectoris                                                                 |
| ICD-10-CM       | I209            | Angina pectoris, unspecified                                                                   |
| ICD-10-CM       | I2102           | STEMI involving left anterior descending coronary artery                                       |
| ICD-10-CM       | I2109           | STEMI involving oth coronary artery of anterior wall                                           |
| ICD-10-CM       | I2111           | STEMI involving right coronary artery                                                          |
| ICD-10-CM       | I2119           | STEMI involving oth coronary artery of inferior wall                                           |
| ICD-10-CM       | I2121           | STEMI involving left circumflex coronary artery                                                |
| ICD-10-CM       | I2129           | STEMI involving oth sites                                                                      |
| ICD-10-CM       | I213            | ST elevation (STEMI) myocardial infarction of unsp site                                        |
| ICD-10-CM       | I214            | Non-ST elevation (NSTEMI) myocardial infarction                                                |
| ICD-10-CM       | I219            | Acute myocardial infarction, unspecified                                                       |
| ICD-10-CM       | I222            | Subsequent non-ST elevation (NSTEMI) myocardial infarction                                     |
| ICD-10-CM       | I240            | Acute coronary thrombosis not resulting in myocardial infrc                                    |
| ICD-10-CM       | I241            | Dressler's syndrome                                                                            |
| ICD-10-CM       | I248            | Other forms of acute ischemic heart disease                                                    |
| ICD-10-CM       | I249            | Acute ischemic heart disease, unspecified                                                      |
| ICD-10-CM       | I2510           | Athscl heart disease of native coronary artery w/o ang pctrs                                   |
| ICD-10-CM       | I25110          | Athscl heart disease of native cor art w unstable ang pctrs                                    |
| ICD-10-CM       | I25111          | Athscl heart disease of native cor art w ang pctrs w spasm                                     |
| ICD-10-CM       | I25118          | Athscl heart disease of native cor art w oth ang pctrs                                         |
| ICD-10-CM       | I25119          | Athscl heart disease of native cor art w unsp ang pctrs                                        |
| ICD-10-CM       | I252            | Old myocardial infarction                                                                      |
| ICD-10-CM       | I253            | Aneurysm of heart                                                                              |
| ICD-10-CM       | I2542           | Coronary artery dissection                                                                     |
| ICD-10-CM       | I255            | Ischemic cardiomyopathy                                                                        |
| ICD-10-CM       | I256            | silent myocardial ischemia                                                                     |
| ICD-10-CM       | I25700          | Atherosclerosis of coronary artery bypass graft(s), unspecified, with unstable angina pectoris |
| ICD-10-CM       | I25708          | Atherosclerosis of CABG, unsp, w oth angina pectoris                                           |
| ICD-10-CM       | I25709          | Atherosclerosis of CABG, unsp, w unsp angina pectoris                                          |

| <b>ICD Type</b> | <b>ICD Code</b> | <b>Description</b>                                             |
|-----------------|-----------------|----------------------------------------------------------------|
| ICD-10-CM       | I25710          | Athscl autologous vein CABG w unstable angina pectoris         |
| ICD-10-CM       | I25719          | Athscl autologous vein CABG w unsp angina pectoris             |
| ICD-10-CM       | I25790          | Atherosclerosis of CABG w unstable angina pectoris             |
| ICD-10-CM       | I25810          | Atherosclerosis of CABG w/o angina pectoris                    |
| ICD-10-CM       | I25811          | Athscl native cor art of transplanted heart w/o ang pctr       |
| ICD-10-CM       | I2582           | Chronic total occlusion of coronary artery                     |
| ICD-10-CM       | I2583           | Coronary atherosclerosis due to lipid rich plaque              |
| ICD-10-CM       | I2584           | Coronary atherosclerosis due to calcified coronary lesion      |
| ICD-10-CM       | I2589           | Other forms of chronic ischemic heart disease                  |
| ICD-10-CM       | I259            | Chronic ischemic heart disease, unspecified                    |
| ICD-10-CM       | I609            | Nontraumatic subarachnoid hemorrhage, unspecified              |
| ICD-10-CM       | I610            | Nontraumatic interbl hemorrhage in hemisphere, subcortical     |
| ICD-10-CM       | I611            | Nontraumatic interbl hemorrhage in hemisphere, cortical        |
| ICD-10-CM       | I612            | Nontraumatic intracerebral hemorrhage in hemisphere, unsp      |
| ICD-10-CM       | I615            | Nontraumatic intracerebral hemorrhage, intraventricular        |
| ICD-10-CM       | I619            | Nontraumatic intracerebral hemorrhage, unspecified             |
| ICD-10-CM       | I6200           | Nontraumatic subdural hemorrhage, unspecified                  |
| ICD-10-CM       | I6201           | Nontraumatic acute subdural hemorrhage                         |
| ICD-10-CM       | I6202           | Nontraumatic subacute subdural hemorrhage                      |
| ICD-10-CM       | I6203           | Nontraumatic chronic subdural hemorrhage                       |
| ICD-10-CM       | I629            | Nontraumatic intracranial hemorrhage, unspecified              |
| ICD-10-CM       | I63011          | Cerebral infarction due to thrombosis of r verteb art          |
| ICD-10-CM       | I6309           | Cerebral infarction due to thrombosis of precerebral artery    |
| ICD-10-CM       | I6310           | Cerebral infarction due to embolism of unsp precerb artery     |
| ICD-10-CM       | I63112          | Cerebral infarction due to embolism of left vertebral artery   |
| ICD-10-CM       | I63132          | Cerebral infarction due to embolism of left carotid artery     |
| ICD-10-CM       | I63139          | Cerebral infarction due to embolism of unsp carotid artery     |
| ICD-10-CM       | I6320           | Cereb infrc due to unsp occls or stenosis of unsp precerb art  |
| ICD-10-CM       | I63211          | Cerebral infrc due to unsp occls or stenosis of r verteb art   |
| ICD-10-CM       | I63212          | Cerebral infrc due to unsp occls or stenosis of l verteb art   |
| ICD-10-CM       | I63231          | Cereb infrc due to unsp occls or stenosis of right carotid art |
| ICD-10-CM       | I63232          | Cereb infrc due to unsp occls or stenosis of left carotid art  |
| ICD-10-CM       | I63239          | Cereb infrc due to unsp occls or stenosis of unsp carotid art  |
| ICD-10-CM       | I6330           | Cerebral infarction due to thombos unsp cerebral artery        |
| ICD-10-CM       | I63311          | Cereb infrc due to thombos of right middle cerebral artery     |
| ICD-10-CM       | I63312          | Cerebral infrc due to thombos of left middle cerebral artery   |
| ICD-10-CM       | I63319          | Cerebral infrc due to thombos unsp middle cerebral artery      |
| ICD-10-CM       | I63332          | Cerebral infrc due to thombos of left post cerebral artery     |
| ICD-10-CM       | I6340           | Cerebral infarction due to embolism of unsp cerebral artery    |
| ICD-10-CM       | I63411          | Cereb infrc due to embolism of right middle cerebral artery    |
| ICD-10-CM       | I63412          | Cereb infrc due to embolism of left middle cerebral artery     |
| ICD-10-CM       | I63421          | Cerebral infrc due to embolism of right ant cerebral artery    |
| ICD-10-CM       | I63432          | Cerebral infrc due to embolism of left post cerebral artery    |

| <b>ICD Type</b> | <b>ICD Code</b> | <b>Description</b>                                              |
|-----------------|-----------------|-----------------------------------------------------------------|
| ICD-10-CM       | I6349           | Cerebral infarction due to embolism of other cerebral artery    |
| ICD-10-CM       | I6350           | Cereb infrc due to unsp occls or stenosis of unsp cerebr artery |
| ICD-10-CM       | I63511          | Cereb infrc d/t unsp occls or stenosis of right mid cerebr art  |
| ICD-10-CM       | I63512          | Cereb infrc d/t unsp occls or stenosis of left mid cerebr art   |
| ICD-10-CM       | I63531          | Cereb infrc d/t unsp occls or stenosis of right post cerebr art |
| ICD-10-CM       | I63532          | Cereb infrc d/t unsp occls or stenosis of left post cerebr art  |
| ICD-10-CM       | I63541          | Cereb infrc due to unsp occls or stenosis of right cerebr art   |
| ICD-10-CM       | I63542          | Cereb infrc due to unsp occls or stenosis of left cerebr art    |
| ICD-10-CM       | I6359           | Cereb infrc due to unsp occls or stenosis of cerebral artery    |
| ICD-10-CM       | I638            | Other cerebral infarction                                       |
| ICD-10-CM       | I639            | Cerebral infarction, unspecified                                |
| ICD-10-CM       | I6501           | Occlusion and stenosis of right vertebral artery                |
| ICD-10-CM       | I6502           | Occlusion and stenosis of left vertebral artery                 |
| ICD-10-CM       | I6503           | Occlusion and stenosis of bilateral vertebral arteries          |
| ICD-10-CM       | I6509           | Occlusion and stenosis of unspecified vertebral artery          |
| ICD-10-CM       | I6521           | Occlusion and stenosis of right carotid artery                  |
| ICD-10-CM       | I6522           | Occlusion and stenosis of left carotid artery                   |
| ICD-10-CM       | I6523           | Occlusion and stenosis of bilateral carotid arteries            |
| ICD-10-CM       | I6529           | Occlusion and stenosis of unspecified carotid artery            |
| ICD-10-CM       | I658            | Occlusion and stenosis of other precerebral arteries            |
| ICD-10-CM       | I6601           | Occlusion and stenosis of right middle cerebral artery          |
| ICD-10-CM       | I6602           | Occlusion and stenosis of left middle cerebral artery           |
| ICD-10-CM       | I6613           | Occlusion and stenosis of bi anterior cerebral arteries         |
| ICD-10-CM       | I668            | Occlusion and stenosis of other cerebral arteries               |
| ICD-10-CM       | I669            | Occlusion and stenosis of unspecified cerebral artery           |
| ICD-10-CM       | I670            | Dissection of cerebral arteries, nonruptured                    |
| ICD-10-CM       | I671            | Cerebral aneurysm, nonruptured                                  |
| ICD-10-CM       | I672            | Cerebral atherosclerosis                                        |
| ICD-10-CM       | I674            | Hypertensive encephalopathy                                     |
| ICD-10-CM       | I675            | Moyamoya disease                                                |
| ICD-10-CM       | I676            | Nonpyogenic thrombosis of intracranial venous system            |
| ICD-10-CM       | I6781           | Acute cerebrovascular insufficiency                             |
| ICD-10-CM       | I6782           | Cerebral ischemia                                               |
| ICD-10-CM       | I67848          | Other cerebrovascular vasospasm and vasoconstriction            |
| ICD-10-CM       | I6789           | Other cerebrovascular disease                                   |
| ICD-10-CM       | I679            | Cerebrovascular disease, unspecified                            |
| ICD-10-CM       | I69053          | Hemiplgia following ntrm subarach hemor aff right nondom side   |
| ICD-10-CM       | I69054          | Hemiplgia following ntrm subarach hemor aff left nondom side    |
| ICD-10-CM       | I6910           | Unsp sequelae of nontraumatic intracerebral hemorrhage          |
| ICD-10-CM       | I6911           | Cognitive deficits following nontrau (Invalid, Non-Billable)    |
| ICD-10-CM       | I69154          | Hemiplgia following ntrm intrcbl hemor aff left nondom side     |
| ICD-10-CM       | I6921           | Cognitive deficits following oth ntr (Invalid, Non-Billable)    |
| ICD-10-CM       | I69291          | Dysphagia following oth nontraumatic intracranial hemorrhage    |

| ICD Type  | ICD Code | Description                                                  |
|-----------|----------|--------------------------------------------------------------|
| ICD-10-CM | I6930    | Unspecified sequelae of cerebral infarction                  |
| ICD-10-CM | I6931    | Cognitive deficits following cerebra (Invalid, Non-Billable) |
| ICD-10-CM | I69310   | Attention and concentration deficit following cerebral infrc |
| ICD-10-CM | I69311   | Memory deficit following cerebral infarction                 |
| ICD-10-CM | I69320   | Aphasia following cerebral infarction                        |
| ICD-10-CM | I69321   | Dysphasia following cerebral infarction                      |
| ICD-10-CM | I69322   | Dysarthria following cerebral infarction                     |
| ICD-10-CM | I69328   | Oth speech/lang deficits following cerebral infarction       |
| ICD-10-CM | I69331   | Monoplq upr lmb fol cerebral infrc aff right dominant side   |
| ICD-10-CM | I69341   | Monoplq low lmb fol cerebral infrc aff right dominant side   |
| ICD-10-CM | I69351   | Hemiplga following cerebral infrc aff right dominant side    |
| ICD-10-CM | I69352   | Hemiplga following cerebral infrc aff left dominant side     |
| ICD-10-CM | I69354   | Hemiplga following cerebral infrc affecting left nondom side |
| ICD-10-CM | I69359   | Hemiplga following cerebral infarction affecting unsp side   |
| ICD-10-CM | I69391   | Dysphagia following cerebral infarction                      |
| ICD-10-CM | I69392   | Facial weakness following cerebral infarction                |
| ICD-10-CM | I69393   | Ataxia following cerebral infarction                         |
| ICD-10-CM | I69398   | Other sequelae of cerebral infarction                        |
| ICD-10-CM | I6981    | Cognitive deficits following other c (Invalid, Non-Billable) |
| ICD-10-CM | I69820   | Aphasia following other cerebrovascular disease              |
| ICD-10-CM | I69854   | Hemiplga fol oth cerebvasc disease aff left nondom side      |
| ICD-10-CM | I69859   | Hemiplga following oth cerebvasc disease affecting unsp side |
| ICD-10-CM | I69898   | Other sequelae of other cerebrovascular disease              |
| ICD-10-CM | I6990    | Unspecified sequelae of unspecified cerebrovascular disease  |
| ICD-10-CM | I69920   | Aphasia following unspecified cerebrovascular disease        |
| ICD-10-CM | I69928   | Oth speech/lang deficits following unsp cerebvasc disease    |
| ICD-10-CM | I69953   | Hemiplga fol unsp cerebvasc disease aff right nondom side    |
| ICD-10-CM | I69959   | Hemiplga following unsp cerebvasc disease aff unsp side      |
| ICD-10-CM | I69991   | Dysphagia following unspecified cerebrovascular disease      |
| ICD-10-CM | I69993   | Ataxia following unspecified cerebrovascular disease         |
| ICD-10-CM | I69998   | Other sequelae following unspecified cerebrovascular disease |
| ICD-10-CM | I720     | Aneurysm of carotid artery                                   |
| ICD-10-CM | I722     | Aneurysm of renal artery                                     |
| ICD-10-CM | I723     | Aneurysm of iliac artery                                     |
| ICD-10-CM | I724     | Aneurysm of artery of lower extremity                        |
| ICD-10-CM | I728     | Aneurysm of other specified arteries                         |
| ICD-10-CM | I729     | Aneurysm of unspecified site                                 |
| ICD-10-CM | I7300    | Raynaud's syndrome without gangrene                          |
| ICD-10-CM | I7301    | Raynaud's syndrome with gangrene                             |
| ICD-10-CM | I731     | Thromboangiitis obliterans [Buerger's disease]               |
| ICD-10-CM | I7389    | Other specified peripheral vascular diseases                 |
| ICD-10-CM | I739     | Peripheral vascular disease, unspecified                     |
| ICD-10-CM | Z950     | Presence of cardiac pacemaker                                |

| <b>ICD Type</b> | <b>ICD Code</b> | <b>Description</b>                                           |
|-----------------|-----------------|--------------------------------------------------------------|
| ICD-10-CM       | Z951            | Presence of aortocoronary bypass graft                       |
| ICD-10-CM       | Z952            | Presence of prosthetic heart valve                           |
| ICD-10-CM       | Z953            | Presence of xenogenic heart valve                            |
| ICD-10-CM       | Z954            | Presence of other heart-valve replacement                    |
| ICD-10-CM       | Z955            | Presence of coronary angioplasty implant and graft           |
| ICD-10-CM       | Z95810          | Presence of automatic (implantable) cardiac defibrillator    |
| ICD-10-CM       | Z95818          | Presence of other cardiac implants and grafts                |
| ICD-10-CM       | Z95820          | Peripheral vascular angioplasty status w implants and grafts |
| ICD-10-CM       | Z95828          | Presence of other vascular implants and grafts               |
| ICD-10-CM       | Z959            | Presence of cardiac and vascular implant and graft, unsp     |
| ICD-10-PCS      | _0210099        | Bypass 1 Cor Art from L Int Mammary w Autol Vn, Open         |
| ICD-10-PCS      | _021009W        | Bypass 1 Cor Art from Aorta with Autol Vn, Open Approach     |
| ICD-10-PCS      | _02100A8        | Bypass 1 Cor Art from R Int Mammary w Autol Art, Open        |
| ICD-10-PCS      | _02100A9        | Bypass 1 Cor Art from L Int Mammary w Autol Art, Open        |
| ICD-10-PCS      | _02100AW        | Bypass 1 Cor Art from Aorta with Autol Art, Open Approach    |
| ICD-10-PCS      | _02100Z8        | Bypass 1 Cor Art from R Int Mammary, Open Approach           |
| ICD-10-PCS      | _02100Z9        | Bypass 1 Cor Art from L Int Mammary, Open Approach           |
| ICD-10-PCS      | _021109W        | Bypass 2 Cor Art from Aorta with Autol Vn, Open Approach     |
| ICD-10-PCS      | _02110A3        | Bypass 2 Cor Art from Cor Art with Autol Art, Open Approach  |
| ICD-10-PCS      | _021209W        | Bypass 3 Cor Art from Aorta with Autol Vn, Open Approach     |
| ICD-10-PCS      | _0213093        | Bypass 4+ Cor Art from Cor Art with Autol Vn, Open Approach  |
| ICD-10-PCS      | _0270346        | Dilate 1 Cor Art, Bifurc, w Drug-elut Intra, Perc            |
| ICD-10-PCS      | _027034Z        | Dilation of 1 Cor Art with Drug-elut Intra, Perc Approach    |
| ICD-10-PCS      | _027036Z        | Dilation of 1 Cor Art with 3 Drug-elut, Perc Approach        |
| ICD-10-PCS      | _02703DZ        | Dilation of 1 Cor Art with Intralum Dev, Perc Approach       |
| ICD-10-PCS      | _02703Z6        | Dilation of 1 Cor Art, Bifurc, Perc Approach                 |
| ICD-10-PCS      | _02703ZZ        | Dilation of Coronary Artery, One Artery, Perc Approach       |
| ICD-10-PCS      | _027134Z        | Dilation of 2 Cor Art with Drug-elut Intra, Perc Approach    |
| ICD-10-PCS      | _0271356        | Dilate of 2 Cor Art, Bifurc, with 2 Drug-elut, Perc Approach |
| ICD-10-PCS      | _027135Z        | Dilation of 2 Cor Art with 2 Drug-elut, Perc Approach        |
| ICD-10-PCS      | _0272346        | Dilate 3 Cor Art, Bifurc, w Drug-elut Intra, Perc            |
| ICD-10-PCS      | _027234Z        | Dilation of 3 Cor Art with Drug-elut Intra, Perc Approach    |
| ICD-9-CM        | 412             | OLD MYOCARDIAL INFARCT                                       |
| ICD-9-CM        | 430             | SUBARACHNOID HEMORRHAGE                                      |
| ICD-9-CM        | 431             | INTRACEREBRAL HEMORRHAG                                      |
| ICD-9-CM        | 436             | Acute, but ill-defined, cerebrovascular disease              |
| ICD-9-CM        | 3950            | RHEUMAT AORTIC STENOSIS                                      |
| ICD-9-CM        | 4100            | Acute myocardial infarction of anterolateral wall            |
| ICD-9-CM        | 4104            | Acute myocardial infarction of other inferior wall           |
| ICD-9-CM        | 4107            | Subendocardial infarction                                    |
| ICD-9-CM        | 4110            | POST MI SYNDROME                                             |
| ICD-9-CM        | 4111            | INTERMED CORONARY SYND                                       |
| ICD-9-CM        | 4130            | ANGINA DECUBITUS                                             |

| <b>ICD Type</b> | <b>ICD Code</b> | <b>Description</b>                                                    |
|-----------------|-----------------|-----------------------------------------------------------------------|
| ICD-9-CM        | 4131            | PRINZMETAL ANGINA                                                     |
| ICD-9-CM        | 4139            | ANGINA PECTORIS NEC/NOS                                               |
| ICD-9-CM        | 4140            | Coronary atherosclerosis                                              |
| ICD-9-CM        | 4141            | Aneurysm and dissection of heart                                      |
| ICD-9-CM        | 4142            | CHR TOT OCCLUS COR ARTR                                               |
| ICD-9-CM        | 4143            | COR ATH D/T LPD RCH PLA                                               |
| ICD-9-CM        | 4144            | COR ATH D/T CALC COR LS                                               |
| ICD-9-CM        | 4148            | CHR ISCHEMIC HRT DIS NE                                               |
| ICD-9-CM        | 4149            | CHR ISCHEMIC HRT DIS NO                                               |
| ICD-9-CM        | 4321            | SUBDURAL HEMORRHAGE                                                   |
| ICD-9-CM        | 4329            | INTRACRANIAL HEMORR NOS                                               |
| ICD-9-CM        | 4331            | Occlusion and stenosis of carotid artery                              |
| ICD-9-CM        | 4333            | Occlusion and stenosis of multiple and bilateral precerebral arteries |
| ICD-9-CM        | 4350            | BASILAR ARTERY SYNDROME                                               |
| ICD-9-CM        | 4351            | VERTEBRAL ARTERY SYNDRO                                               |
| ICD-9-CM        | 4352            | SUBCLAVIAN STEAL SYNDRO                                               |
| ICD-9-CM        | 4353            | VERTBROBASLR ARTERY SYN                                               |
| ICD-9-CM        | 4358            | TRANS CEREB ISCHEMIA NE                                               |
| ICD-9-CM        | 4359            | TRANS CEREB ISCHEMIA NO                                               |
| ICD-9-CM        | 4370            | CEREBRAL ATHEROSCLEROSI                                               |
| ICD-9-CM        | 4371            | AC CEREBROVASC INSUF NO                                               |
| ICD-9-CM        | 4372            | HYPERTENS ENCEPHALOPATH                                               |
| ICD-9-CM        | 4373            | NONRUPT CEREBRAL ANEURY                                               |
| ICD-9-CM        | 4375            | MOYAMOYA DISEASE                                                      |
| ICD-9-CM        | 4376            | NONPYOGEN THROMBOS SINU                                               |
| ICD-9-CM        | 4377            | TRANSIENT GLOBAL AMNESI                                               |
| ICD-9-CM        | 4378            | CEREBROVASC DISEASE NEC                                               |
| ICD-9-CM        | 4379            | CEREBROVASC DISEASE NOS                                               |
| ICD-9-CM        | 4380            | LATE EF CV DIS-COGNF DE                                               |
| ICD-9-CM        | 4384            | Monoplegia of lower limb                                              |
| ICD-9-CM        | 4386            | ALTERATION OF SENSATION                                               |
| ICD-9-CM        | 4387            | DISTURBANCES OF VISION                                                |
| ICD-9-CM        | 4389            | LATE EFFECT CV DIS NOS                                                |
| ICD-9-CM        | 4419            | AORTIC ANEURYSM NOS                                                   |
| ICD-9-CM        | 4439            | PERIPH VASCULAR DIS NOS                                               |
| ICD-9-CM        | 25070           | DMII CIRC NT ST UNCNTRL                                               |
| ICD-9-CM        | 25071           | DMI CIRC NT ST UNCNTRLD                                               |
| ICD-9-CM        | 25072           | DMII CIRC UNCNTRLD                                                    |
| ICD-9-CM        | 25073           | DMI CIRC UNCNTRLD                                                     |
| ICD-9-CM        | 41000           | AMI ANTEROLATERAL, UNSPE                                              |
| ICD-9-CM        | 41001           | AMI ANTEROLATERAL, INIT                                               |
| ICD-9-CM        | 41010           | AMI ANTERIOR WALL, UNSPE                                              |
| ICD-9-CM        | 41011           | AMI ANTERIOR WALL, INIT                                               |

| <b>ICD Type</b> | <b>ICD Code</b> | <b>Description</b>       |
|-----------------|-----------------|--------------------------|
| ICD-9-CM        | 41012           | AMI ANTERIOR WALL,SUBSE  |
| ICD-9-CM        | 41020           | AMI INFEROLATERAL,UNSP   |
| ICD-9-CM        | 41021           | AMI INFEROLATERAL, INIT  |
| ICD-9-CM        | 41030           | AMI INFEROPOST, UNSPEC   |
| ICD-9-CM        | 41031           | AMI INFEROPOST, INITIAL  |
| ICD-9-CM        | 41040           | AMI INFERIOR WALL,UNSP   |
| ICD-9-CM        | 41041           | AMI INFERIOR WALL, INIT  |
| ICD-9-CM        | 41042           | AMI INFERIOR WALL,SUBSE  |
| ICD-9-CM        | 41051           | AMI LATERAL NEC, INITIA  |
| ICD-9-CM        | 41060           | TRUE POST INFARCT,UNSP   |
| ICD-9-CM        | 41061           | TRUE POST INFARCT, INIT  |
| ICD-9-CM        | 41070           | SUBENDO INFARCT, UNSPEC  |
| ICD-9-CM        | 41071           | SUBENDO INFARCT, INITIA  |
| ICD-9-CM        | 41072           | SUBENDO INFARCT, SUBSEQ  |
| ICD-9-CM        | 41080           | AMI NEC, UNSPECIFIED     |
| ICD-9-CM        | 41081           | AMI NEC, INITIAL         |
| ICD-9-CM        | 41082           | AMI NEC, SUBSEQUENT      |
| ICD-9-CM        | 41090           | AMI NOS, UNSPECIFIED     |
| ICD-9-CM        | 41091           | AMI NOS, INITIAL         |
| ICD-9-CM        | 41092           | AMI NOS, SUBSEQUENT      |
| ICD-9-CM        | 41181           | ACUTE COR OCCLSN W/O MI  |
| ICD-9-CM        | 41189           | AC ISCHEMIC HRT DIS NEC  |
| ICD-9-CM        | 41400           | COR ATH UNSP VSL NTV/GF  |
| ICD-9-CM        | 41401           | CRNRY ATHRSCL NATVE VSS  |
| ICD-9-CM        | 41402           | CRN ATH ATLG VN BPS GRF  |
| ICD-9-CM        | 41404           | COR ATH ARTRY BYPAS GRF  |
| ICD-9-CM        | 41405           | COR ATH BYPASS GRAFT NO  |
| ICD-9-CM        | 41406           | COR ATH NATV ART TP HRT  |
| ICD-9-CM        | 41407           | COR ATH BPS GRAFT TP HR  |
| ICD-9-CM        | 41410           | ANEURYSM OF HEART        |
| ICD-9-CM        | 41411           | ANEURYSM CORONARY VESSE  |
| ICD-9-CM        | 41412           | DISSECTION COR ARTERY    |
| ICD-9-CM        | 43300           | OCL BSLR ART WO INFRCT   |
| ICD-9-CM        | 43310           | OCL CRTD ART WO INFRCT   |
| ICD-9-CM        | 43311           | OCL CRTD ART W INFRCT    |
| ICD-9-CM        | 43320           | OCL VRTB ART WO INFRCT   |
| ICD-9-CM        | 43321           | OCL VRTB ART W INFRCT    |
| ICD-9-CM        | 43330           | OCL MLT BI ART WO INFRCT |
| ICD-9-CM        | 43331           | OCL MLT BI ART W INFRCT  |
| ICD-9-CM        | 43380           | OCL SPCF ART WO INFRCT   |
| ICD-9-CM        | 43381           | OCL SPCF ART W INFRCT    |
| ICD-9-CM        | 43390           | OCL ART NOS WO INFRCT    |
| ICD-9-CM        | 43391           | OCL ART NOS W INFRCT     |



| <b>ICD Type</b> | <b>ICD Code</b> | <b>Description</b>       |
|-----------------|-----------------|--------------------------|
| ICD-9-CM        | 43400           | CRBL THRMBS WO INFRCT    |
| ICD-9-CM        | 43401           | CRBL THRMBS W INFRCT     |
| ICD-9-CM        | 43410           | CRBL EMBLSM WO INFRCT    |
| ICD-9-CM        | 43411           | CRBL EMBLSM W INFRCT     |
| ICD-9-CM        | 43490           | CRBL ART OC NOS WO INFR  |
| ICD-9-CM        | 43491           | CRBL ART OCL NOS W INFR  |
| ICD-9-CM        | 43810           | LATE EF-SPCH/LNG DEF NO  |
| ICD-9-CM        | 43811           | LATE EFF CV DIS-APHASIA  |
| ICD-9-CM        | 43812           | LATE EFF CV DIS-DYSPHSI  |
| ICD-9-CM        | 43813           | LATE EFF CV-DYSARTHRIA   |
| ICD-9-CM        | 43819           | LATE EF-SPCH/LANG DF NE  |
| ICD-9-CM        | 43820           | LATE EF-HEMPLGA SIDE NO  |
| ICD-9-CM        | 43821           | LATE EF-HEMPLGA DOM SID  |
| ICD-9-CM        | 43822           | LATE EF-HEMIPLGA NON-DO  |
| ICD-9-CM        | 43831           | LATE EF-MPLGA UP LMB DO  |
| ICD-9-CM        | 43841           | LTE EF-MPLGA LOW LMB DO  |
| ICD-9-CM        | 43882           | LATE EF CV DIS DYSPHAGI  |
| ICD-9-CM        | 43883           | FACIAL WEAKNESS          |
| ICD-9-CM        | 43884           | ATAXIA                   |
| ICD-9-CM        | 43885           | VERTIGO                  |
| ICD-9-CM        | 43889           | LATE EFFECT CV DIS NEC   |
| ICD-9-CM        | 44020           | ATHSCL EXTRM NTV ART NO  |
| ICD-9-CM        | 44021           | ATH EXT NTV AT W CLAUDC  |
| ICD-9-CM        | 44022           | ATH EXT NTV AT W RST PN  |
| ICD-9-CM        | 44023           | ATH EXT NTV ART ULCRTIO  |
| ICD-9-CM        | 44024           | ATH EXT NTV ART GNGRENE  |
| ICD-9-CM        | 44029           | ATHRSC EXTRM NTV ART OT  |
| ICD-9-CM        | 44381           | ANGIOPATHY IN OTHER DIS  |
| ICD-9-CM        | 44389           | PERIPH VASCULAR DIS NEC  |
| ICD-9-PCS       | 3606            | INS NONDRUG ELUT COR ST  |
| ICD-9-PCS       | 3607            | INS DRUG-ELUT CORONRY ST |
| ICD-9-PCS       | 3611            | AORTOCOR BYPAS-1 COR ART |
| ICD-9-PCS       | 3612            | AORTOCOR BYPAS-2 COR ART |
| ICD-9-PCS       | 3613            | AORTOCOR BYPAS-3 COR ART |
| ICD-9-PCS       | 3615            | 1 INT MAM-COR ART BYPASS |
| ICD-9-PCS       | 3616            | 2 INT MAM-COR ART BYPASS |
| ICD-9-PCS       | 3619            | HRT REVAS BYPS ANAS NEC  |
| ICD-9-PCS       | _0066           | PTCA OR CORONARY ATHER   |

**Table S2. Prescription lipid lowering therapy drugs.**

| <b>Brand Name</b>         | <b>Generic Name</b>          |
|---------------------------|------------------------------|
| PRALUENT PEN              | alirocumab                   |
| EZETIMIBE-SIMVASTATIN     | ezetimibe/simvastatin        |
| VYTORIN                   | ezetimibe/simvastatin        |
| CHOLESTYRAMINE            | cholestyramine (with sugar)  |
| CHOLESTYRAMINE LIGHT      | cholestyramine/aspartame     |
| COLESTIPOL HCL            | colestipol HCl               |
| PREVALITE                 | cholestyramine/aspartame     |
| WELCHOL                   | colesevelam HCl              |
| ANTARA                    | fenofibrate,micronized       |
| FENOFIBRATE               | fenofibrate                  |
| FENOFIBRATE               | fenofibrate nanocrystallized |
| FENOFIBRATE               | fenofibrate,micronized       |
| FENOFIBRIC ACID           | fenofibric acid (choline)    |
| GEMFIBROZIL               | gemfibrozil                  |
| TRICOR                    | fenofibrate nanocrystallized |
| ATORVASTATIN CALCIUM      | atorvastatin calcium         |
| CRESTOR                   | rosuvastatin calcium         |
| FLUVASTATIN SODIUM        | fluvastatin sodium           |
| LIPITOR                   | atorvastatin calcium         |
| LIVALO                    | pitavastatin calcium         |
| LOVASTATIN                | lovastatin                   |
| PRAVASTATIN SODIUM        | pravastatin sodium           |
| ROSUVASTATIN CALCIUM      | rosuvastatin calcium         |
| SIMVASTATIN               | simvastatin                  |
| NIACIN ER                 | niacin                       |
| EZETIMIBE                 | ezetimibe                    |
| ZETIA                     | ezetimibe                    |
| LOVAZA                    | omega-3 acid ethyl esters    |
| OMEGA-3 ACID ETHYL ESTERS | omega-3 acid ethyl esters    |
| VASCEPA                   | icosapent ethyl              |

**Table S3. Prescription antihypertensive drugs.**

| <b>Brand Name</b>                  | <b>Generic Name</b>            |
|------------------------------------|--------------------------------|
| ACCURETIC                          | quinapril/hydrochlorothiazide  |
| ACEBUTOLOL HCL                     | acebutolol HCl                 |
| ACETAZOLAMIDE                      | acetazolamide                  |
| ADEMPAS                            | riociguat                      |
| AMILORIDE HCL                      | amiloride HCl                  |
| AMILORIDE-HYDROCHLOROTHIAZIDE      | amiloride/hydrochlorothiazide  |
| AMLODIPINE BESYLATE                | amlodipine besylate            |
| AMLODIPINE BESYLATE-BENAZEPRIL     | amlodipine besylate/benazepril |
| AMLODIPINE-OLMESARTAN              | amlodipine bes/olmesartan med  |
| AMLODIPINE-VALSARTAN               | amlodipine besylate/valsartan  |
| AMLODIPINE-VALSARTAN-HCTZ          | amlodipine/valsartan/hcthiazid |
| ATENOLOL                           | atenolol                       |
| ATENOLOL-CHLORTHALIDONE            | atenolol/chlorthalidone        |
| AZOR                               | amlodipine bes/olmesartan med  |
| BENAZEPRIL HCL                     | benazepril HCl                 |
| BENAZEPRIL-HYDROCHLOROTHIAZIDE     | benazepril/hydrochlorothiazide |
| BENICAR                            | olmesartan medoxomil           |
| BENICAR HCT                        | olmesartan/hydrochlorothiazide |
| BISOPROLOL FUMARATE                | bisoprolol fumarate            |
| BISOPROLOL-HYDROCHLOROTHIAZIDE     | bisoprolol/hydrochlorothiazide |
| BUMETANIDE                         | bumetanide                     |
| BYSTOLIC                           | nebivolol HCl                  |
| CANDESARTAN CILEXETIL              | candesartan cilexetil          |
| CANDESARTAN-<br>HYDROCHLOROTHIAZID | candesartan/hydrochlorothiazid |
| CAPTOPRIL                          | captopril                      |
| CAPTOPRIL-HYDROCHLOROTHIAZIDE      | captopril/hydrochlorothiazide  |
| CARDIZEM LA                        | diltiazem HCl                  |
| CARTIA XT                          | diltiazem HCl                  |
| CARVEDILOL                         | carvedilol                     |
| CHLORTHALIDONE                     | chlorthalidone                 |
| CLONIDINE                          | clonidine                      |
| CLONIDINE HCL                      | clonidine HCl                  |
| COREG CR                           | carvedilol phosphate           |
| COZAAR                             | losartan potassium             |
| DILTIAZEM 12HR ER                  | diltiazem HCl                  |
| DILTIAZEM 24HR CD                  | diltiazem HCl                  |
| DILTIAZEM 24HR ER                  | diltiazem HCl                  |
| DILTIAZEM ER                       | diltiazem HCl                  |
| DILTIAZEM HCL                      | diltiazem HCl                  |
| DILT-XR                            | diltiazem HCl                  |
| DOXAZOSIN MESYLATE                 | doxazosin mesylate             |
| DYAZIDE                            | triamterene/hydrochlorothiazid |
| EDARBI                             | azilsartan medoxomil           |

| <b>Brand Name</b>                  | <b>Generic Name</b>             |
|------------------------------------|---------------------------------|
| EDARBYCLOR                         | azilsartan med/chlorthalidone   |
| ENALAPRIL MALEATE                  | enalapril maleate               |
| ENALAPRIL-HYDROCHLOROTHIAZIDE      | enalapril/hydrochlorothiazide   |
| ENTRESTO                           | sacubitril/valsartan            |
| EPLERENONE                         | eplerenone                      |
| EXFORGE                            | amlodipine besylate/valsartan   |
| FELODIPINE ER                      | felodipine                      |
| FOSINOPRIL SODIUM                  | fosinopril sodium               |
| FOSINOPRIL-HYDROCHLOROTHIAZIDE     | fosinopril/hydrochlorothiazide  |
| FUROSEMIDE                         | furosemide                      |
| HYDRALAZINE HCL                    | hydralazine HCl                 |
| HYDROCHLOROTHIAZIDE                | hydrochlorothiazide             |
| INDAPAMIDE                         | indapamide                      |
| IRBESARTAN                         | irbesartan                      |
| IRBESARTAN-HYDROCHLOROTHIAZIDE     | irbesartan/hydrochlorothiazide  |
| ISRADIPINE                         | isradipine                      |
| LABETALOL HCL                      | labetalol HCl                   |
| LASIX                              | furosemide                      |
| LETAIRIS                           | ambrisentan                     |
| LISINOPRIL                         | lisinopril                      |
| LISINOPRIL-HYDROCHLOROTHIAZIDE     | lisinopril/hydrochlorothiazide  |
| LOSARTAN POTASSIUM                 | losartan potassium              |
| LOSARTAN-HYDROCHLOROTHIAZIDE       | losartan/hydrochlorothiazide    |
| MATZIM LA                          | diltiazem HCl                   |
| METHAZOLAMIDE                      | methazolamide                   |
| METHYLDOPA                         | methyl dopa                     |
| METHYLDOPA-<br>HYDROCHLOROTHIAZIDE | methyl dopa/hydrochlorothiazide |
| METOLAZONE                         | metolazone                      |
| METOPROLOL SUCCINATE               | metoprolol succinate            |
| METOPROLOL TARTRATE                | metoprolol tartrate             |
| METOPROLOL-<br>HYDROCHLOROTHIAZIDE | metoprolol/hydrochlorothiazide  |
| MINOXIDIL                          | minoxidil                       |
| MOEXIPRIL HCL                      | moexipril HCl                   |
| NADOLOL                            | nadolol                         |
| NIFEDIPINE                         | nifedipine                      |
| NIFEDIPINE ER                      | nifedipine                      |
| NISOLDIPINE                        | nisoldipine                     |
| OLMESARTAN MEDOXOMIL               | olmesartan medoxomil            |
| OLMESARTAN-AMLODIPINE-HCTZ         | olmesartan/amlodipin/hcthiazid  |
| OLMESARTAN-<br>HYDROCHLOROTHIAZIDE | olmesartan/hydrochlorothiazide  |
| PERINDOPRIL ERBUMINE               | perindopril erbumine            |
| PRAZOSIN HCL                       | prazosin HCl                    |

| <b>Brand Name</b>                  | <b>Generic Name</b>            |
|------------------------------------|--------------------------------|
| PROPRANOLOL HCL                    | propranolol HCl                |
| PROPRANOLOL HCL ER                 | propranolol HCl                |
| QUINAPRIL HCL                      | quinapril HCl                  |
| QUINAPRIL-HYDROCHLOROTHIAZIDE      | quinapril/hydrochlorothiazide  |
| RAMIPRIL                           | ramipril                       |
| REVATIO                            | sildenafil citrate             |
| SILDENAFIL                         | sildenafil citrate             |
| SPIRONOLACTONE                     | spironolactone                 |
| SPIRONOLACTONE-HCTZ                | spironolact/hydrochlorothiazid |
| TARKA                              | trandolapril/verapamil HCl     |
| TAZTIA XT                          | diltiazem HCl                  |
| TEKTURNA                           | aliskiren hemifumarate         |
| TELMISARTAN                        | telmisartan                    |
| TELMISARTAN-<br>HYDROCHLOROTHIAZID | telmisartan/hydrochlorothiazid |
| TENORMIN                           | atenolol                       |
| TERAZOSIN HCL                      | terazosin HCl                  |
| TIMOLOL MALEATE                    | timolol maleate                |
| TOPROL XL                          | metoprolol succinate           |
| TORSEMIDE                          | torsemide                      |
| TRACLEER                           | bosentan                       |
| TRANDOLAPRIL                       | trandolapril                   |
| TRANDOLAPRIL-VERAPAMIL ER          | trandolapril/verapamil HCl     |
| TRIAMTERENE-<br>HYDROCHLOROTHIAZID | triamterene/hydrochlorothiazid |
| TRIBENZOR                          | olmesartan/amlodipin/hcthiazid |
| VALSARTAN                          | valsartan                      |
| VALSARTAN-HYDROCHLOROTHIAZIDE      | valsartan/hydrochlorothiazide  |
| VERAPAMIL ER                       | verapamil HCl                  |
| VERAPAMIL ER PM                    | verapamil HCl                  |
| VERAPAMIL HCL                      | verapamil HCl                  |
| VERAPAMIL SR                       | verapamil HCl                  |
